# Supplementary material for: Preclinical evaluation of a TEX101 protein ELISA test for the differential diagnosis of male infertility
Source: PubMed Central journal article supplement (PMC5363040; doi:10.1186/s12916-017-0817-5), 2017-03-23
Supplement: 12916_2017_817_MOESM4_ESM.pdf [file 12916_2017_817_MOESM4_ESM.pdf]

**Additional file 4: Table S3.** Diagnosis, sperm count and TEX101 levels in SP of 17 infertile men with high sperm count ( $\geq 7$  mln/mL). Prior to ELISA measurements, samples were incubated with 3 M guanidine hydrochloride for 1 hour at RT. Notes: \*TEX101 protein was detected by additional peptide LMSGILAVGPMFVR, however accurate ratios based on internal standard could not be calculated due to its low levels ( $<LOQ$ ) in these specific samples

| Sample # | Group                   | Sperm count (mln/mL) | TEX101 in SP by ELISA (ng/mL) | TEX101 in SP by SRM (ng/mL) | TEX101 in spermatozoa by SRM (ng/ $\mu$ g total protein) |
|----------|-------------------------|----------------------|-------------------------------|-----------------------------|----------------------------------------------------------|
| 1        | Unexplained infertility | 111.1                | <0.5                          | 3051.8                      | 0.11                                                     |
| 2        | Unexplained infertility | 91.1                 | 2.82                          | 742.4                       | 0.16                                                     |
| 3        | Unexplained infertility | 30                   | <0.5                          | 420.3                       | 0.02                                                     |
| 4        | Unexplained infertility | 58.8                 | <0.5                          | 978.1                       | 0.22                                                     |
| 5        | Unexplained infertility | 18.5                 | <0.5                          | 1140.3                      | 0.08                                                     |
| 6        | Unexplained infertility | 26.1                 | <0.5                          | Not Detected                | 0.13                                                     |
| 7        | Unexplained infertility | 59                   | <0.5                          | 2082.2                      | 0.09                                                     |
| 8        | Unexplained infertility | 104.5                | <0.5                          | 1099.7                      | 0.05                                                     |
| 9        | Unexplained infertility | 123.9                | <0.5                          | 389.3                       | 0.15                                                     |
| 10       | Unexplained infertility | 139.5                | <0.5                          | 1289.6                      | 0.81                                                     |
| 11       | Oligospermia            | 6.9                  | <0.5                          | Not Detected                | Detected*                                                |
| 12       | Oligospermia            | 10.3                 | <0.5                          | 104.5                       | 0.05                                                     |
| 13       | Oligospermia            | 7.7                  | <0.5                          | 758.4                       | 0.18                                                     |
| 14       | Oligospermia            | 8.4                  | <0.5                          | 265.6                       | 0.06                                                     |
| 15       | Oligospermia            | 9.9                  | <0.5                          | Not Detected                | 0.01                                                     |
| 16       | Oligospermia            | 10.9                 | <0.5                          | 324.3                       | 0.07                                                     |
| 17       | Oligospermia            | 12.8                 | <0.5                          | Detected*                   | 0.05                                                     |
