# Supplementary material for: Preclinical evaluation of a TEX101 protein ELISA test for the differential diagnosis of male infertility
Source: PubMed Central journal article supplement (PMC5363040; doi:10.1186/s12916-017-0817-5), 2017-03-23
Supplement: 12916_2017_817_MOESM9_ESM.pdf [file 12916_2017_817_MOESM9_ESM.pdf]

**Additional file 9: Table S4.** Column statistics for TEX101 analysis in seminal plasma samples ( $N=805$ ) using DOC-based protocol (2% sodium deoxycholate for 1 hour at 63°C). Q1: 25<sup>th</sup> percentile, Q3: 75<sup>th</sup> percentile, IQR: Interquartile range

| Samples                             | TEX101 (ng/mL) |            |            |              |              |
|-------------------------------------|----------------|------------|------------|--------------|--------------|
|                                     | <i>N</i>       | Q1         | Median     | Q3           | IQR          |
| Pre-Vasectomy                       | 64             | 2,728      | 5,436      | 12,036       | 9,308        |
| Post-Vasectomy                      | 57             | 0.5        | 0.5        | 0.6          | 0.1          |
| Unexplained infertility             | 277            | 1,325      | 4,967      | 11,013       | 9,688        |
| Oligospermia                        | 270            | 51         | 450        | 1,494        | 1,443        |
| Azoospermia                         | 137            | 0.5        | 0.5        | 0.9          | 0.4          |
| Azoospermia, unknown form           | 20             | 0.5        | 0.6        | 4.0          | 3.5          |
| Non-obstructive azoospermia (NOA)   |                |            |            |              |              |
| <i>Hypospermatogenesis</i>          | 5              | 0.7        | 70.4       | 590          | 590          |
| <i>Maturation arrest</i>            | 21             | 0.5        | 1.9        | 329          | 328          |
| <i>Sertoli-cell only</i>            | 13             | 0.5        | 0.5        | 0.6          | 0.1          |
| <i>Unknown histological subtype</i> | 42             | 0.5        | 0.6        | 2.5          | 2.0          |
| Obstructive azoospermia (OA)        | 36             | 0.5        | 0.5        | 0.7          | 0.2          |
| <b>TOTAL</b>                        | <b>805</b>     | <b>5.8</b> | <b>771</b> | <b>5,016</b> | <b>5,010</b> |
