# Supplementary material for: Preclinical evaluation of a TEX101 protein ELISA test for the differential diagnosis of male infertility
Source: PubMed Central journal article supplement (PMC5363040; doi:10.1186/s12916-017-0817-5), 2017-03-23

**Additional file 10: Figure S6.** Correlation between sperm count and TEX101 levels in SP. Samples were incubated with 2% sodium deoxycholate for 1 hour at 63°C, prior to TEX101 analysis by ELISA.  $r_s$ , Spearman correlation coefficient.

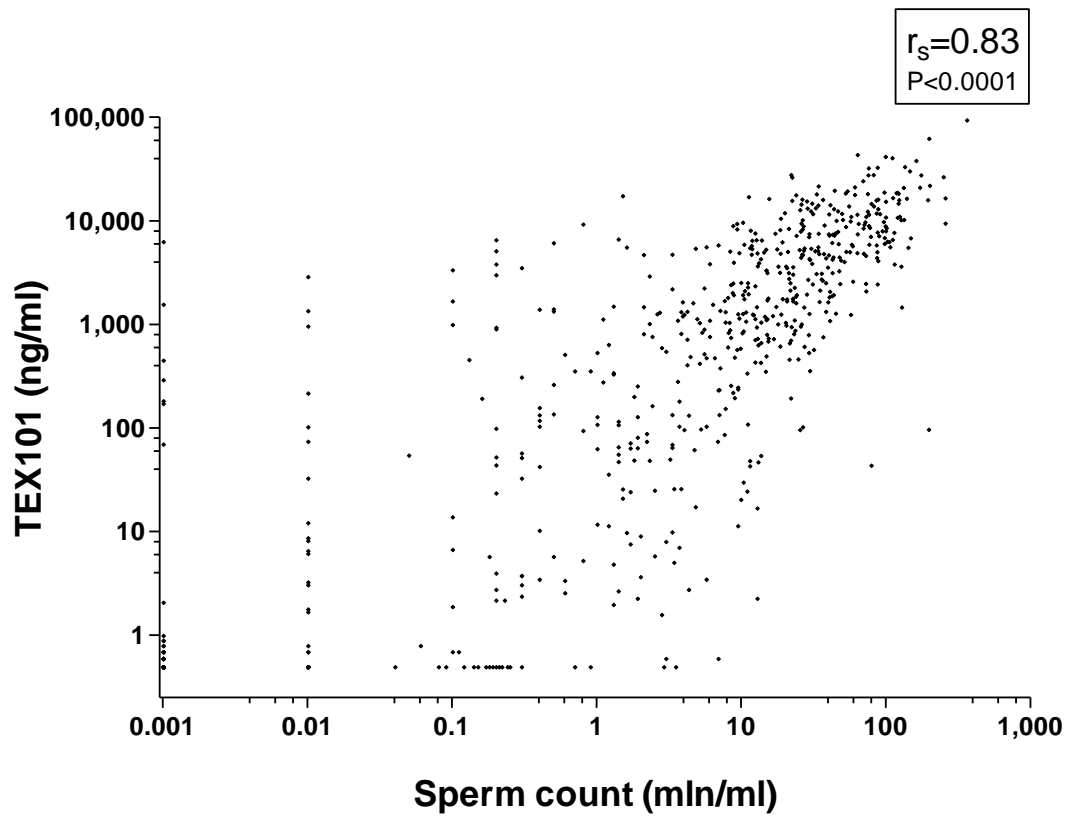

Supplement: 12916_2017_817_MOESM10_ESM.pdf [file 12916_2017_817_MOESM10_ESM.pdf]
