# Supplementary material for: Preclinical evaluation of a TEX101 protein ELISA test for the differential diagnosis of male infertility
Source: PubMed Central journal article supplement (PMC5363040; doi:10.1186/s12916-017-0817-5), 2017-03-23
Supplement: 12916_2017_817_MOESM11_ESM.pdf [file 12916_2017_817_MOESM11_ESM.pdf]

**Additional file 11: Table S5.** The list of Standards for Reporting of Diagnostic Accuracy Studies (STARD2015) recommendations followed in the present work.

| <b>Section &amp; Topic</b> | <b>No</b>  | <b>Item</b>                                                                                                                                            | <b>Reported on page #</b>              |
|----------------------------|------------|--------------------------------------------------------------------------------------------------------------------------------------------------------|----------------------------------------|
| <b>TITLE OR ABSTRACT</b>   | <b>1</b>   | Identification as a study of diagnostic accuracy using at least one measure of accuracy (such as sensitivity, specificity, predictive values, or AUC)  | p. 1, 3                                |
| <b>ABSTRACT</b>            | <b>2</b>   | Structured summary of study design, methods, results, and conclusions (for specific guidance, see STARD for Abstracts)                                 | p. 1                                   |
| <b>INTRODUCTION</b>        | <b>3</b>   | Scientific and clinical background, including the intended use and clinical role of the index test                                                     | p. 2                                   |
|                            | <b>4</b>   | Study objectives and hypotheses                                                                                                                        | p. 2                                   |
| <b>METHODS</b>             |            |                                                                                                                                                        |                                        |
| <i>Study design</i>        | <b>5</b>   | Whether data collection was planned before the index test and reference standard were performed (prospective study) or after (retrospective study)     | Introduction, p. 1<br>Methods, p. 2, 6 |
| <i>Participants</i>        | <b>6</b>   | Eligibility criteria                                                                                                                                   | Methods, p. 2                          |
|                            | <b>7</b>   | On what basis potentially eligible participants were identified (such as symptoms, results from previous tests, inclusion in registry)                 | Methods, p. 2, 6                       |
|                            | <b>8</b>   | Where and when potentially eligible participants were identified (setting, location and dates)                                                         | Methods, p.6                           |
|                            | <b>9</b>   | Whether participants formed a consecutive, random or convenience series                                                                                | Methods, p. 6                          |
| <i>Test methods</i>        | <b>10a</b> | Index test, in sufficient detail to allow replication                                                                                                  | Methods, p. 3, 4                       |
|                            | <b>10b</b> | Reference standard, in sufficient detail to allow replication                                                                                          | Methods, p. 3                          |
|                            | <b>11</b>  | Rationale for choosing the reference standard (if alternatives exist)                                                                                  | Methods, p. 3                          |
|                            | <b>12a</b> | Definition of and rationale for test positivity cut-offs or result categories of the index test, distinguishing pre-specified from exploratory         | Methods, p. 3, 5, 6                    |
|                            | <b>12b</b> | Definition of and rationale for test positivity cut-offs or result categories of the reference standard, distinguishing pre-specified from exploratory | Methods, p. 3                          |
|                            | <b>13a</b> | Whether clinical information and reference standard results were available to the performers/readers of the index test                                 | Methods, p. 3                          |
|                            | <b>13b</b> | Whether clinical information and index test results were available to the assessors of the reference standard                                          | Methods, p. 3                          |
| <i>Analysis</i>            | <b>14</b>  | Methods for estimating or comparing measures of diagnostic accuracy                                                                                    | Methods, p. 5, 6                       |
|                            | <b>15</b>  | How indeterminate index test or reference standard results were handled                                                                                | NA                                     |
|                            | <b>16</b>  | How missing data on the index test and reference standard                                                                                              | NA                                     |

|                          |            |                                                                                                             |                     |
|--------------------------|------------|-------------------------------------------------------------------------------------------------------------|---------------------|
|                          |            | were handled                                                                                                |                     |
|                          | <b>17</b>  | Any analyses of variability in diagnostic accuracy, distinguishing pre-specified from exploratory           | NA                  |
|                          | <b>18</b>  | Intended sample size and how it was determined                                                              | Methods, p. 2, 6    |
| <b>RESULTS</b>           |            |                                                                                                             |                     |
| <i>Participants</i>      | <b>19</b>  | Flow of participants, using a diagram                                                                       | Figure 1            |
|                          | <b>20</b>  | Baseline demographic and clinical characteristics of participants                                           | Table 1             |
|                          | <b>21a</b> | Distribution of severity of disease in those with the target condition                                      | Table 1             |
|                          | <b>21b</b> | Distribution of alternative diagnoses in those without the target condition                                 | NA                  |
|                          | <b>22</b>  | Time interval and any clinical interventions between index test and reference standard                      | Methods, p. 2, 6    |
| <i>Test results</i>      | <b>23</b>  | Cross tabulation of the index test results (or their distribution) by the results of the reference standard | Figure 4c           |
|                          | <b>24</b>  | Estimates of diagnostic accuracy and their precision (such as 95% confidence intervals)                     | Methods, p. 5-6     |
|                          | <b>25</b>  | Any adverse events from performing the index test or the reference standard                                 | NA                  |
| <b>DISCUSSION</b>        |            |                                                                                                             |                     |
|                          | <b>26</b>  | Study limitations, including sources of potential bias, statistical uncertainty, and generalisability       | Discussion, p.13,14 |
|                          | <b>27</b>  | Implications for practice, including the intended use and clinical role of the index test                   | Discussion, p.14    |
| <b>OTHER INFORMATION</b> |            |                                                                                                             |                     |
|                          | <b>28</b>  | Registration number and name of registry                                                                    | NA                  |
|                          | <b>29</b>  | Where the full study protocol can be accessed                                                               | NA                  |
|                          | <b>30</b>  | Sources of funding and other support; role of funders                                                       | Abstract, p.1       |
