# Supplementary material for: Preclinical evaluation of a TEX101 protein ELISA test for the differential diagnosis of male infertility
Source: Springer Nature journal article supplement (doi:10.1186/s12916-017-0817-5), 2017-03-11
Supplement: MOESM1 [file 12169348]

**Additional file 1: Table S1.** Parameters of SRM assay of TEX101 protein. K\*, heavy isotope-labeled *L*-Lysine ( $^{13}\text{C}_6$ ,  $^{15}\text{N}_2$ ); R\*, heavy isotope-labeled *L*-Arginine ( $^{13}\text{C}_6$ ,  $^{15}\text{N}_4$ ); IS, spike-in internal standard; Q1 and Q3; first and third quadrupoles of the triple quadrupole mass spectrometer; CE, collision energy. Heavy isotope-labeled peptides AGTETAILATK and QIQTSSSQTSPEEAMGTPR included C-term quantifying JPT tags (serine-alanine-[3-nitro] tyrosine-glycine) which were cleaved by trypsin prior to SRM analysis

| <b>TEX101 peptide</b> | <b>Q1<br/>(m/z)</b> | <b>Q3<br/>(m/z)</b> | <b>CE<br/>(V)</b> | <b>Scan<br/>time<br/>(ms)</b> | <b>Retention<br/>time<br/>(min)</b> | <b>Peptide type</b> |
|-----------------------|---------------------|---------------------|-------------------|-------------------------------|-------------------------------------|---------------------|
| AGTETAILATK           | 538.3               | 717.5               | 21.6              | 40                            | 12.4                                | Light endogenous    |
| AGTETAILATK           | 538.3               | 846.5               | 21.6              | 40                            | 12.4                                | Light endogenous    |
| AGTETAILATK           | 538.3               | 1004.6              | 21.6              | 40                            | 12.4                                | Light endogenous    |
| AGTETAILATK*          | 542.3               | 725.5               | 21.6              | 40                            | 12.4                                | Heavy IS            |
| AGTETAILATK*          | 542.3               | 854.5               | 21.6              | 40                            | 12.4                                | Heavy IS            |
| AGTETAILATK*          | 542.3               | 1012.6              | 21.6              | 40                            | 12.4                                | Heavy IS            |
| QIQTSSSQTSPEEAMGTPR   | 1018.0              | 987.5               | 37.9              | 40                            | 11.7                                | Light endogenous    |
| QIQTSSSQTSPEEAMGTPR   | 1018.0              | 1390.6              | 37.9              | 40                            | 11.7                                | Light endogenous    |
| QIQTSSSQTSPEEAMGTPR   | 1018.0              | 1477.7              | 37.9              | 40                            | 11.7                                | Light endogenous    |
| QIQTSSSQTSPEEAMGTPR*  | 1023.0              | 997.5               | 37.9              | 40                            | 11.7                                | Heavy IS            |
| QIQTSSSQTSPEEAMGTPR*  | 1023.0              | 1400.6              | 37.9              | 40                            | 11.7                                | Heavy IS            |
| QIQTSSSQTSPEEAMGTPR*  | 1023.0              | 1487.7              | 37.9              | 40                            | 11.7                                | Heavy IS            |
| LMSGILAVGPMFVR        | 745.9               | 649.3               | 28.7              | 40                            | 26                                  | Light endogenous    |
| LMSGILAVGPMFVR        | 745.9               | 989.6               | 28.7              | 40                            | 26                                  | Light endogenous    |
| LMSGILAVGPMFVR        | 745.9               | 1246.7              | 28.7              | 40                            | 26                                  | Light endogenous    |
