# Supplementary material for: Preclinical evaluation of a TEX101 protein ELISA test for the differential diagnosis of male infertility
Source: Springer Nature journal article supplement (doi:10.1186/s12916-017-0817-5), 2017-03-11
Supplement: MOESM2 [file 12169348]

**Additional file 2: Table S2.** Column statistics for TEX101 analysis in SP samples ( $N=821$ ) by ELISA using GndCl-based treatment protocol (3 M guanidine hydrochloride for 1 hour at RT).

Q1: 25<sup>th</sup> percentile, Q3: 75<sup>th</sup> percentile, IQR: Interquartile range

| Samples                             | TEX101 (ng/mL) |            |            |              |              |
|-------------------------------------|----------------|------------|------------|--------------|--------------|
|                                     | <i>N</i>       | Q1         | Median     | Q3           | IQR          |
| Pre-Vasectomy                       | 65             | 1,435      | 3,433      | 6938         | 5,504        |
| Post-Vasectomy                      | 61             | 0.5        | 0.5        | 0.5          | 0            |
| Unexplained infertility             | 276            | 1,173      | 2,875      | 5,237        | 4,064        |
| Oligospermia                        | 269            | 21.8       | 271        | 972          | 950          |
| Azoospermia                         | 150            | 0.5        | 0.5        | 0.7          | 0.2          |
| Azoospermia, unknown form           | 22             | 0.5        | 0.5        | 2.3          | 1.8          |
| Non-obstructive azoospermia (NOA)   |                |            |            |              |              |
| <i>Hypospermatogenesis</i>          | 8              | 0.7        | 4          | 94.5         | 93.8         |
| <i>Maturation Arrest</i>            | 22             | 0.5        | 0.9        | 175          | 174          |
| <i>Sertoli-cell only</i>            | 13             | 0.5        | 0.5        | 0.5          | 0            |
| <i>Unknown histological subtype</i> | 51             | 0.5        | 0.5        | 0.8          | 0.3          |
| Obstructive azoospermia (OA)        | 34             | 0.5        | 0.5        | 0.5          | 0            |
| <b>TOTAL</b>                        | <b>821</b>     | <b>0.8</b> | <b>429</b> | <b>2,654</b> | <b>2,654</b> |
