# Supplementary material for: Preclinical evaluation of a TEX101 protein ELISA test for the differential diagnosis of male infertility
Source: Springer Nature journal article supplement (doi:10.1186/s12916-017-0817-5), 2017-03-11

**Additional file 3: Figure S1.** TEX101 levels measured in SP samples ( $N=821$ ) by ELISA using GndCl-based protocol (3 M guanidine hydrochloride for 1 hour at RT). Median values for each group are shown as red bars. **Pre-V:** pre-vasectomy samples; **Post-V:** post-vasectomy samples; **Unexplained infertility:** infertile men with sperm count  $>15$  mln/mL; **Oligospermia:** infertile men with sperm count  $<15$  mln/mL; **Azoospermia:** men diagnosed with azoospermia (undetectable sperm in semen).

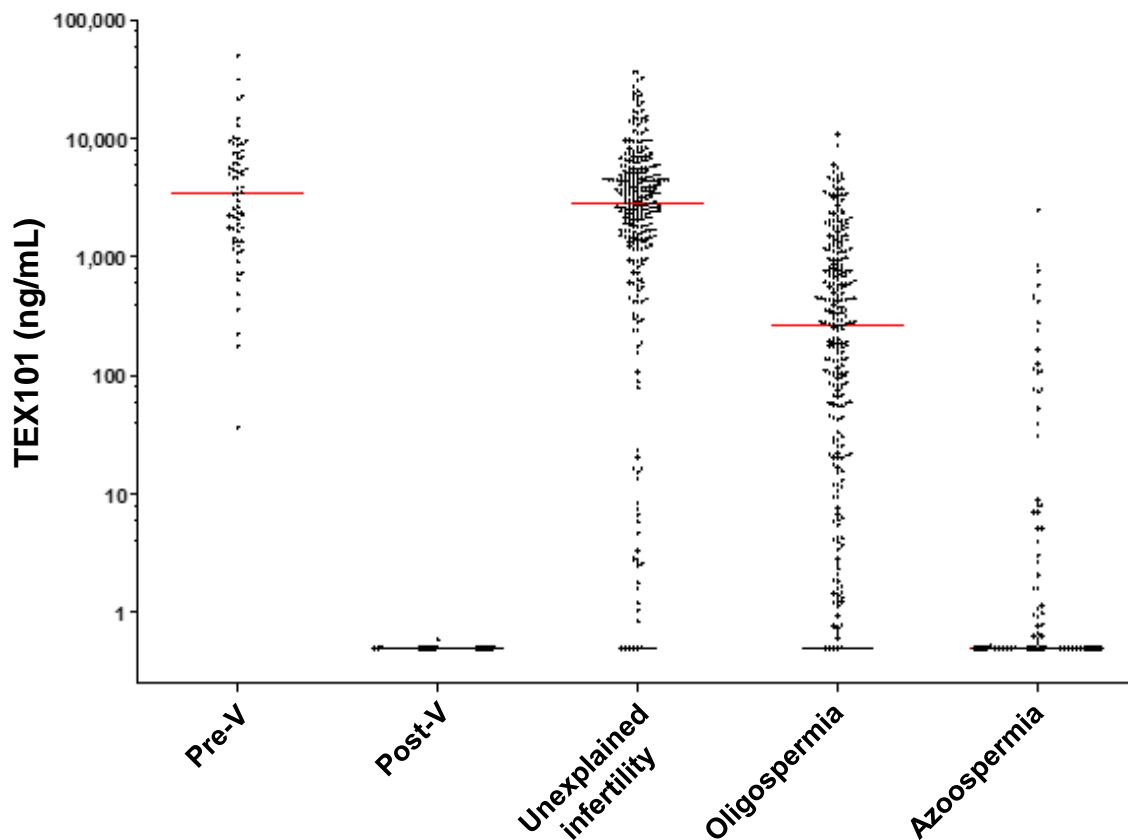

Supplement: MOESM3 [file 12169348]
