# Supplementary material for: Preclinical evaluation of a TEX101 protein ELISA test for the differential diagnosis of male infertility
Source: Springer Nature journal article supplement (doi:10.1186/s12916-017-0817-5), 2017-03-11

**Additional file 5: Figure S2.** Quantification of total and intracellular TEX101 in pooled SP samples by SRM assays. The heavy isotope-labeled peptides AGTETAILATK\* (total TEX101) and QIQTSSSQTSPEEAMGTPR\* (intracellular TEX101) with a trypsin-cleavable JPT tag (serine-alanine-[3-nitro]tyrosine-glycine) were used as internal standards for the absolute quantification of endogenous TEX101 proteoforms. Calibration curves were generated by spiking increasing amounts of the internal standards into 1  $\mu$ L of SP before proteomic sample preparation and trypsin digestion.

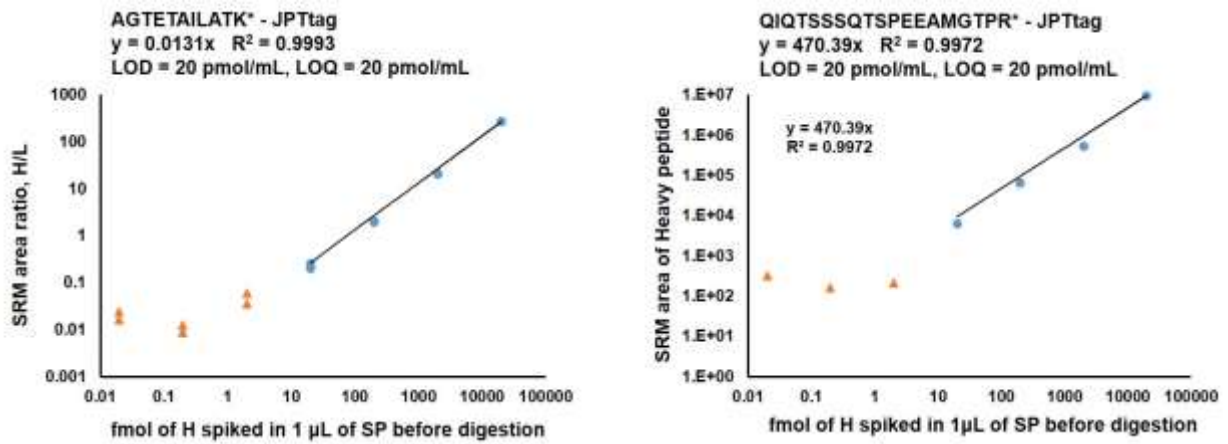

Supplement: MOESM5 [file 12169348]
