# Supplementary material for: Preclinical evaluation of a TEX101 protein ELISA test for the differential diagnosis of male infertility
Source: Springer Nature journal article supplement (doi:10.1186/s12916-017-0817-5), 2017-03-11

**Additional file 6: Figure S3.** Amount of TEX101 per  $\mu\text{g}$  of digested total protein in different SP pools and their respective vesicle-free and vesicles fractions, as measured by SRM. Dotted red line represents LOD of SRM assay ( $27 \text{ pg}/\mu\text{g}$  of total protein).

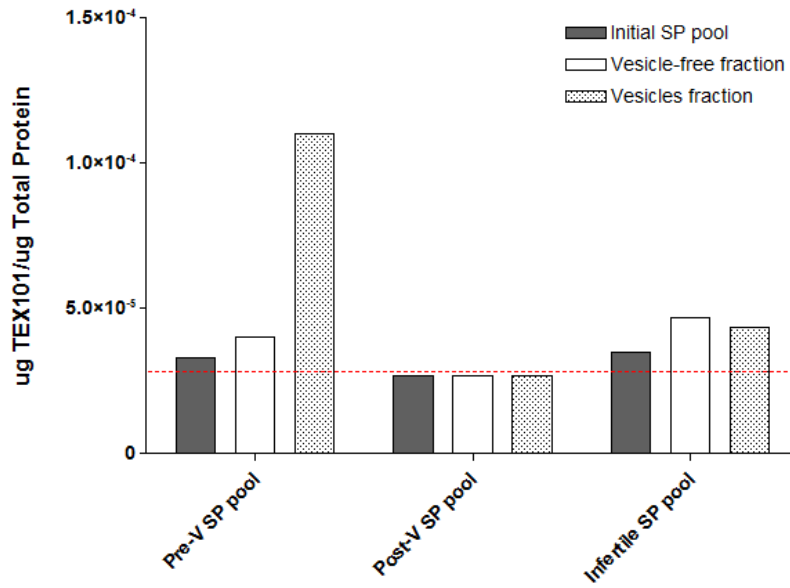

Supplement: MOESM6 [file 12169348]
