# Supplementary material for: Preclinical evaluation of a TEX101 protein ELISA test for the differential diagnosis of male infertility
Source: Springer Nature journal article supplement (doi:10.1186/s12916-017-0817-5), 2017-03-11

**Additional file 8: Figure S5.** TEX101 stability in the whole semen. Semen samples were stored at +4°C, centrifuged at each time point, and TEX101 was measured by ELISA with DOC-based protocol.

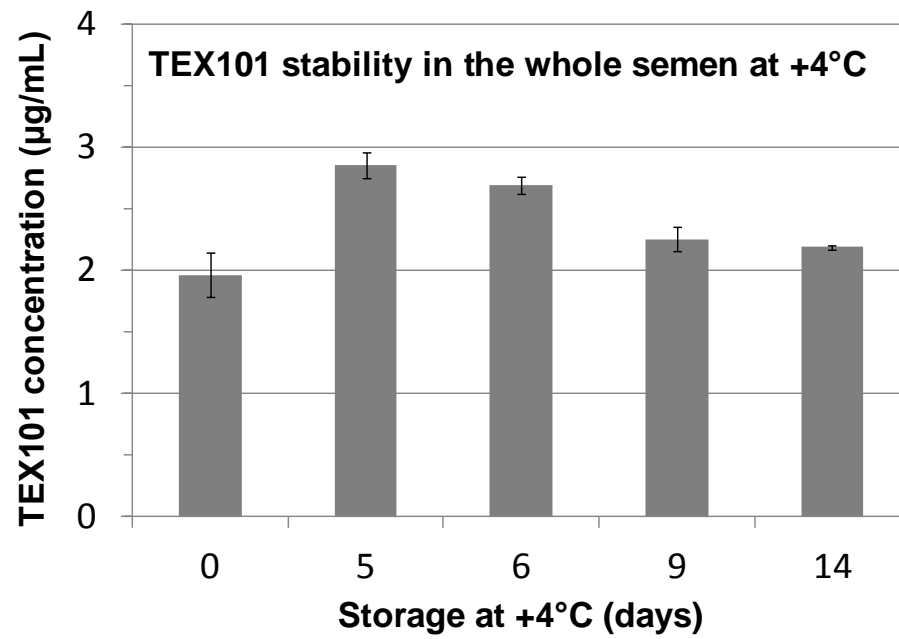

Supplement: MOESM8 [file 12169348]
